# Supplementary material for: Fibrosis independent atrial fibrillation in older patients is driven by substrate leukocyte infiltration: diagnostic and prognostic implications to patients undergoing cardiac surgery
Source: Springer Nature journal article supplement (doi:10.1186/s12967-019-02162-5), 2019-12-01

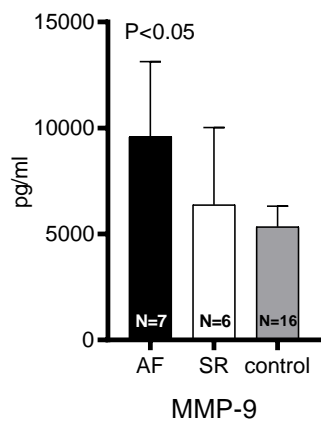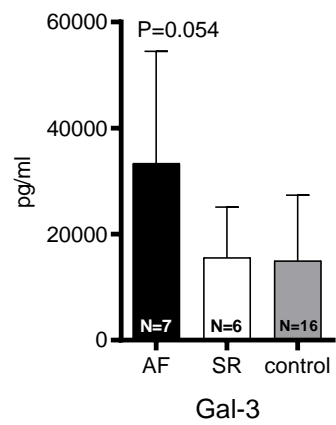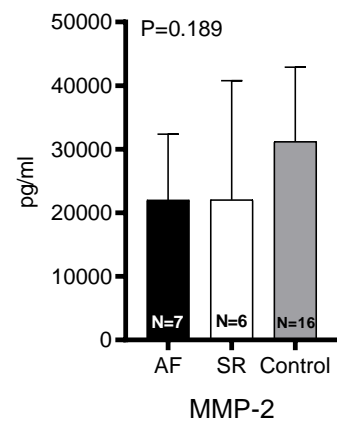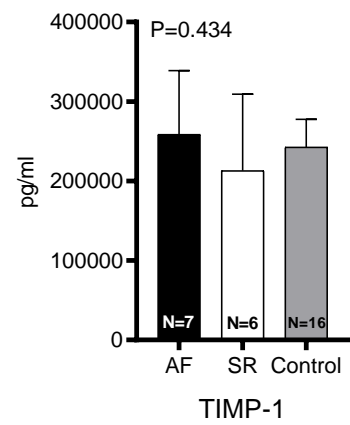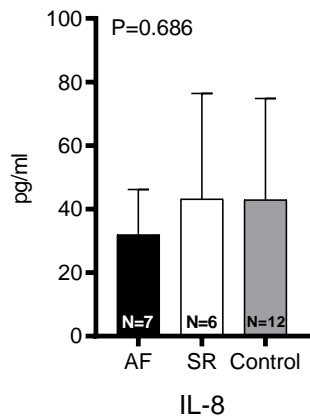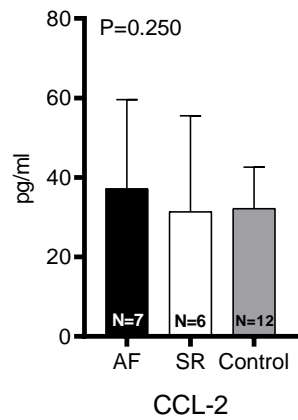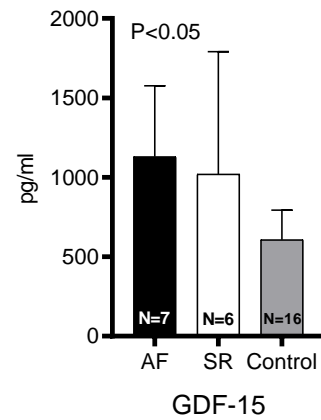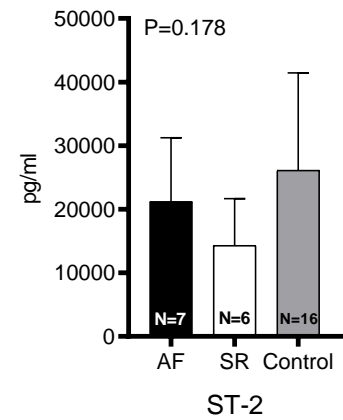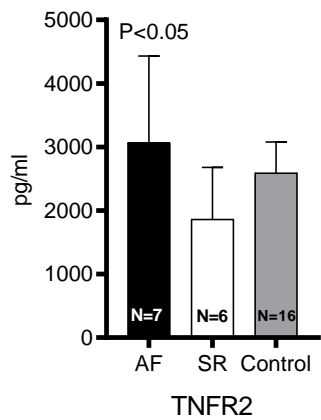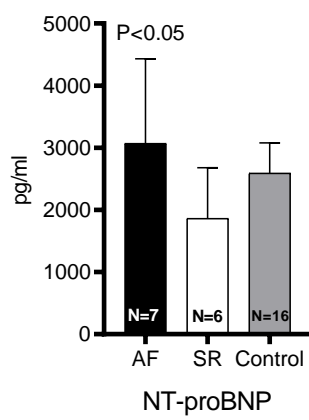

Supplement: MOESM4 [file 17490638]
